# Supplementary material
Source: PubMed Central journal article supplement (PMC2940980)
Supplement: NIHMS227759-supplement-1.pdf [file NIHMS227759-supplement-1.pdf]

**A** 66cl4-luc cells  
(x 10<sup>4</sup>)

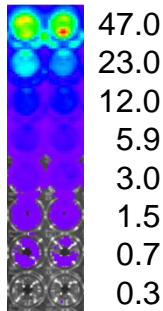

**B**

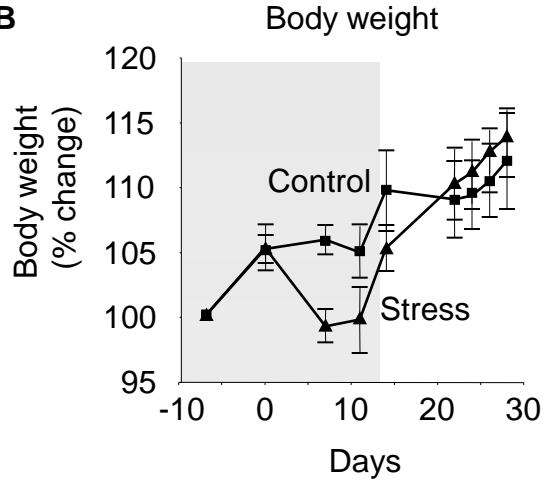

**Supplemental Figure 1. Detection sensitivity and effects of restraint stress.** A. Luciferase activity was measured in serial dilutions of luciferase-tagged 66cl4 mammary adenocarcinoma cells. B. Relative change in mouse body weight following the initiation of stress on day -7 prior to tumor inoculation on Day 0. Duration of stress: grey shading.

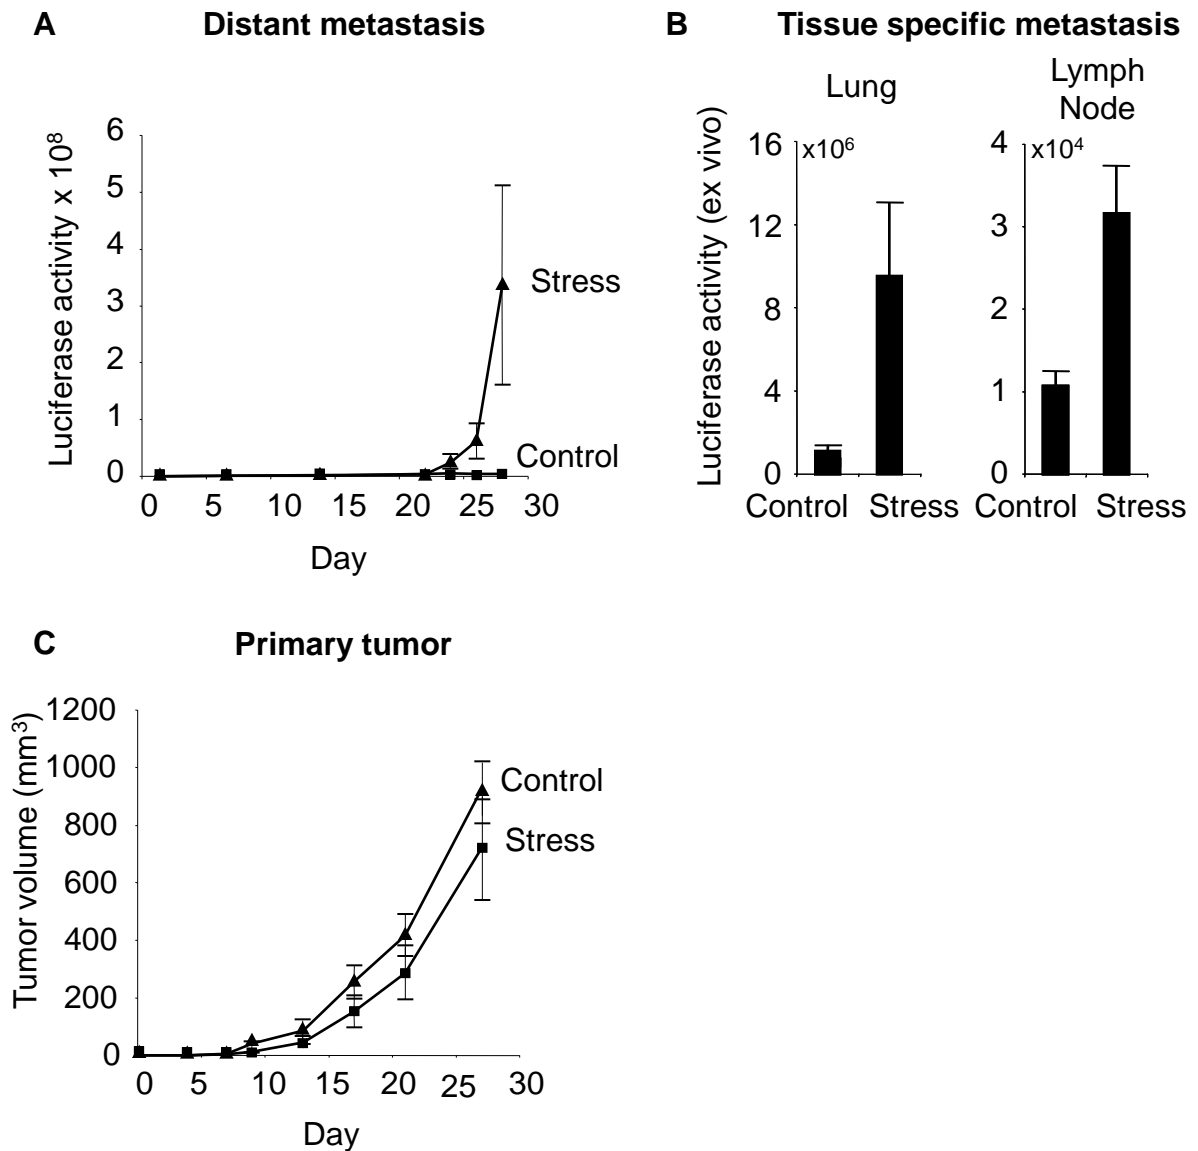

**Supplemental Figure 2. Role of T lymphocytes.** A. 66cl4 tumor cells ( $1 \times 10^5$ ) were injected into the 4th mammary fat pad of T cell-deficient *nu/nu* mice and metastasis to distant tissues was quantified over time using in vivo bioluminescent imaging. B. On day 28, tissue-specific metastasis was quantified by ex vivo bioluminescent imaging of tumor masses in lung and lymph nodes (axillary and brachial). C. Primary tumor volume was determined by caliper measurements. Data: mean  $\pm$  S.E.

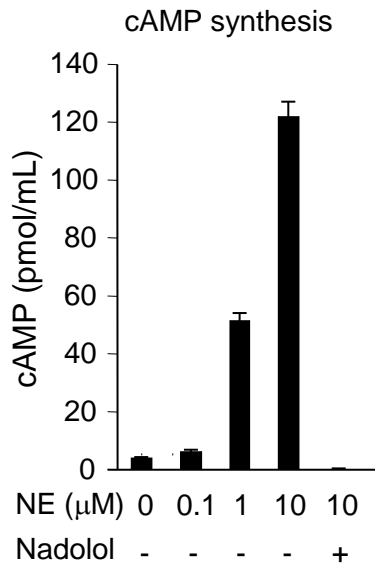

**Supplemental Figure 3. cAMP synthesis in response to NE stimulation.** 66cl4 cells were treated with norepinephrine (NE)  $\pm$  nadolol and cAMP synthesis was quantified by ELISA.

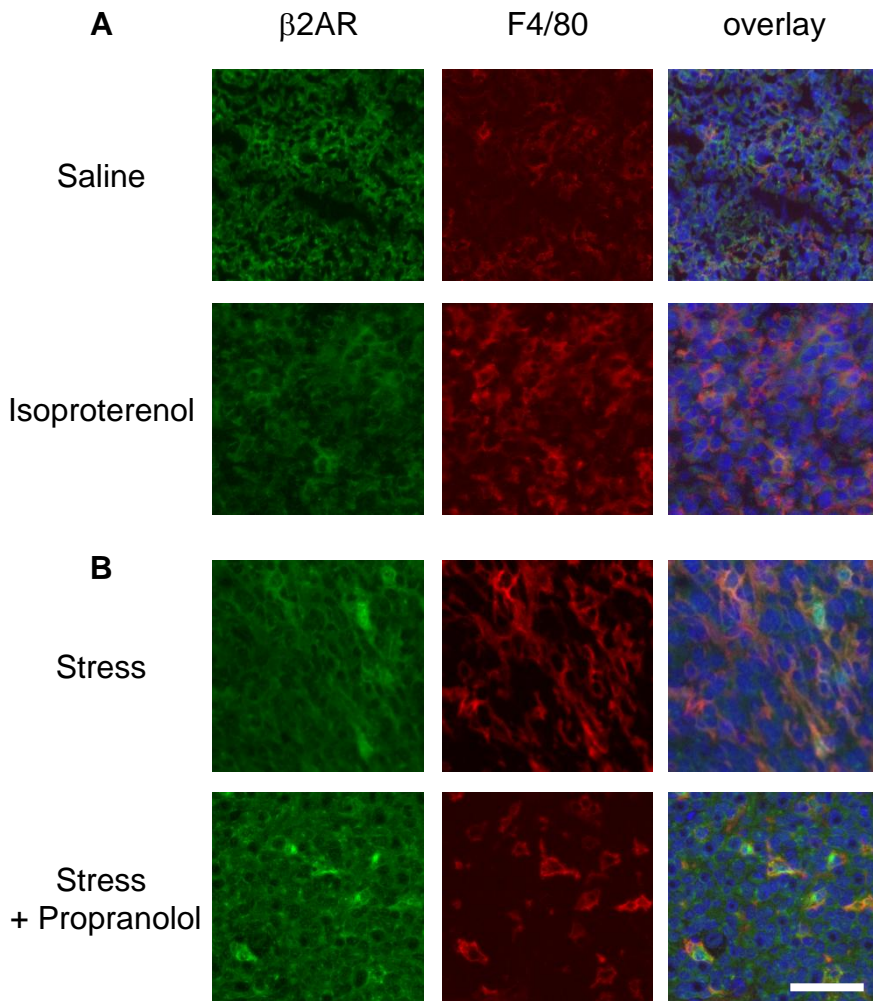

**Supplemental Figure 4. Effects of SNS signaling on macrophage infiltration of primary mammary tumors.** Mammary tumor cryosections from (A) saline and isoproterenol treated mice, or (B) stressed mice treated with placebo vs. propranolol were immunostained with anti- $\beta$ 2AR (green) and anti-F4/80 (red), and nuclei were counterstained with Hoechst 33324 (blue). Scale bar: 50 $\mu$ m.

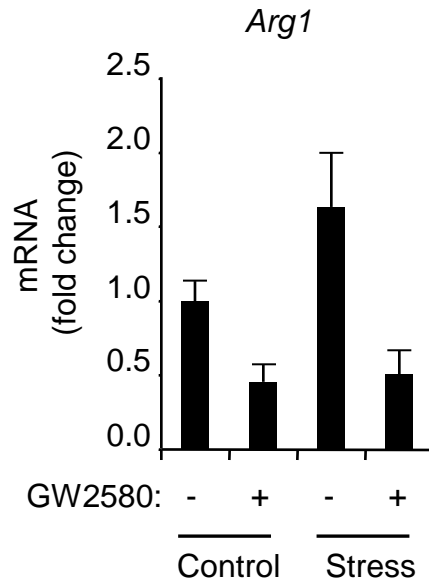

**Supplemental Figure 5.** *Arg1* mRNA levels were assayed by RT-PCR in primary mammary tumor RNA.
